# Supplementary material
Source: MDPI journal article supplement (https://www.mdpi.com/2071-1050/12/18/7639)
Supplement: s1 [file s1]

## Supplementary Material

Table S1 shows the complete list of variables used in the main text and in Appendix A and their relative sources.

**Table S1.** Variables description.

| Variable                                   | Definition                                                                                                                                                                                                                                                                                   | Source               |
|--------------------------------------------|----------------------------------------------------------------------------------------------------------------------------------------------------------------------------------------------------------------------------------------------------------------------------------------------|----------------------|
| <i>Dependent variable</i>                  |                                                                                                                                                                                                                                                                                              |                      |
| LnSpread                                   | Logarithm of the initial all-in-drawn spread over LIBOR of the loan granted to the $i$ -th firm in $t$ .                                                                                                                                                                                     | DealScan             |
| <i>Key explanatory variables</i>           |                                                                                                                                                                                                                                                                                              |                      |
| EW_Rating                                  | Equal-weighted rating, based on the information in the ASSET4 economic, environmental, social, and corporate governance pillars, of the $i$ -th firm in the year preceding $t$ .                                                                                                             | ASSET4               |
| HighEWRating                               | Dummy variable equal to 1 if the CSR equal-weighted rating of the $i$ -th firm in the year preceding $t$ is in the highest tertile of the empirical distribution.                                                                                                                            | Authors' elaboration |
| LowEWRating                                | Dummy variable equal to 1 if the CSR equal-weighted rating of the $i$ -th firm in the year preceding $t$ is in the lowest tertile of the empirical distribution.                                                                                                                             | Authors' elaboration |
| HighESGCountry                             | Dummy variable equal to 1 if the ESG rating assigned by Bloomberg to the $i$ -th firm's home country in the year preceding $t$ is above the average of the sample.                                                                                                                           | Authors' elaboration |
| <i>Borrower variables</i>                  |                                                                                                                                                                                                                                                                                              |                      |
| Size                                       | Logarithm of total assets of the $i$ -th firm in the year preceding $t$ .                                                                                                                                                                                                                    | Datastream           |
| CashFlow                                   | Ratio of cash flow to total assets of the $i$ -th firm in the year preceding $t$ .                                                                                                                                                                                                           | Datastream           |
| ROS                                        | Ratio of operating income to sales revenue of the $i$ -th firm in the year preceding $t$ .                                                                                                                                                                                                   | Datastream           |
| IE_Revenue                                 | Ratio of interest expenses to total revenues of the $i$ -th firm in the year preceding $t$ .                                                                                                                                                                                                 | Datastream           |
| Leverage                                   | Ratio of total assets minus total equity to total assets of the $i$ -th firm in the year preceding $t$ .                                                                                                                                                                                     | Datastream           |
| MTBV                                       | Market-to-book ratio of the $i$ -th firm in the year preceding $t$ .                                                                                                                                                                                                                         | Datastream           |
| Stock_StdDev                               | Annualized stock volatility based on weekly stock prices of the $i$ -th firm over the year prior to $t$ .                                                                                                                                                                                    | Datastream           |
| Risk_Weight                                | Risk weight assigned to the $i$ -th firm using the Basel II standardized approach.                                                                                                                                                                                                           | Authors' elaboration |
| Industry                                   | Indicator variables for industry sectors present in our sample and based on 2-digit SIC codes (Mining; Construction; Manufacturing; Transportation and Public Utilities; Wholesale Trade; Retail Trade; Services; Public Administration). Mining is the omitted variable in all regressions. | DealScan             |
| <i>Loan variables</i>                      |                                                                                                                                                                                                                                                                                              |                      |
| Maturity                                   | Maturity of the loan in months.                                                                                                                                                                                                                                                              | DealScan             |
| Secured                                    | Dummy variable equal to 1 if the loan is secured; 0 otherwise.                                                                                                                                                                                                                               | DealScan             |
| Covenant                                   | Dummy variable equal to 1 if there are covenants in the loan contract; 0 otherwise.                                                                                                                                                                                                          | DealScan             |
| Purpose                                    | Indicator variables for M&A, Capital Expenditures, Leverage buyout, Restructuring, Working capital, Miscellaneous. M&A is the omitted variable in all regressions.                                                                                                                           | DealScan             |
| Type                                       | Indicator variables for Revolver/Line, Term_Loan, Bridge_Loan, Other. Revolver/Line is the omitted variable in all regressions.                                                                                                                                                              | DealScan             |
| Seniority                                  | Indicator variables for Seniority, Mezzanine and Subordinated loans. Seniority is the omitted variable in all regressions.                                                                                                                                                                   | DealScan             |
| Loan_Concentration                         | Log of (loan package amount/(loan package amount + total debt)).                                                                                                                                                                                                                             | DealScan             |
| <i>Country and other control variables</i> |                                                                                                                                                                                                                                                                                              |                      |
| Sov_Stock_Ret                              | Stock index return of the country where the $i$ -th firm is established over the three months preceding $t$ .                                                                                                                                                                                | Datastream           |
| Sov_Rating                                 | S&P long-term foreign currency rating of the country where the $i$ -th firm is established and mapped into 22 numerical categories (22 is assigned to AAA level and 1 to SD).                                                                                                                | Datastream           |
| Ref_rate                                   | Loan reference rate (Euribor or Libor) value observed in $t$ .                                                                                                                                                                                                                               | Datastream           |
| Lme                                        | Dummy variable equal to 1 if firm headquarter is located in a liberal market economy (United Kingdom and Denmark); 0 otherwise.                                                                                                                                                              | Authors' elaboration |
| LLme                                       | Dummy variable equal to 1 if firm headquarter is located in a liberal-like market economy (Estonia, Finland, Netherlands, Ireland, Sweden); 0 otherwise.                                                                                                                                     | Authors' elaboration |
| Cme                                        | Dummy variable equal to 1 if firm headquarter is located in a coordinated market economy (Austria, Belgium, Germany, France); 0 otherwise. Cme is the omitted variable in all regressions.                                                                                                   | Authors' elaboration |

|                                                  |                                                                                                                                                                |                      |
|--------------------------------------------------|----------------------------------------------------------------------------------------------------------------------------------------------------------------|----------------------|
| Sd                                               | Dummy variable equal to 1 if firm headquarter is located in a state-dominated market economy (Czech Rep., Slovakia, Poland, Romania, Slovenia); 0 otherwise.   | Authors' elaboration |
| Hy                                               | Dummy variable equal to 1 if firm headquarter is located in a hybrid market economy (Italy, Spain, Cyprus, Portugal, Greece); 0 otherwise.                     | Authors' elaboration |
| Year dummies                                     | Indicator variables for year dummies.                                                                                                                          |                      |
| <i>Other variables used in robustness checks</i> |                                                                                                                                                                |                      |
| EW_Rating_Lag                                    | Lagged CSR rating of the <i>i</i> -th firm from 3 years before <i>t</i> .                                                                                      | ASSET4               |
| NWC                                              | Ratio of net working capital to total assets of the <i>i</i> -th firm in the year preceding <i>t</i> .                                                         | Datastream           |
| OpInc                                            | Ratio of operating income to total assets of the <i>i</i> -th firm in the year preceding <i>t</i> .                                                            | Datastream           |
| RET                                              | Ratio of retained earnings to total assets of the <i>i</i> -th firm in the year preceding <i>t</i> .                                                           | Datastream           |
| Lambda                                           | Inverse Mills ratio from the selection equation.                                                                                                               | Authors' elaboration |
| Relationship                                     | Dummy variable equal to 1 if the arranger was in a syndicated loan granted to the <i>i</i> -th firm prior to current loan in the analyzed period; otherwise 0. | DealScan             |
| Share                                            | Share of the loan to the <i>i</i> -th firm held by each arranger.                                                                                              | DealScan             |
| NumLenders                                       | Number of lenders in the syndicate.                                                                                                                            | DealScan             |

Table S2 reports the correlations among variables used in the main test.

**Table S2.** Correlation matrix.

|                    | (1)   | (2)   | (3)   | (4)   | (5)   | (6)   | (7)   | (8)   | (9)   | (10)  | (11)  | (12)  | (13)  |
|--------------------|-------|-------|-------|-------|-------|-------|-------|-------|-------|-------|-------|-------|-------|
| LnSpread (1)       | 1.00  | -0.21 | -0.40 | -0.20 | -0.07 | 0.15  | 0.09  | 0.02  | 0.42  | 0.46  | 0.01  | -0.19 | -0.36 |
| EW_Rating (2)      | -0.21 | 1.00  | 0.50  | -0.06 | -0.01 | -0.09 | 0.09  | -0.09 | -0.02 | -0.26 | -0.06 | -0.08 | -0.12 |
| Size (3)           | -0.40 | 0.50  | 1.00  | -0.12 | 0.05  | 0.04  | 0.19  | -0.28 | -0.15 | -0.45 | 0.00  | -0.09 | 0.08  |
| CashFlow (4)       | -0.20 | -0.06 | -0.12 | 1.00  | 0.20  | -0.20 | -0.34 | 0.32  | -0.20 | -0.11 | -0.06 | 0.08  | 0.15  |
| ROS (5)            | -0.07 | -0.01 | 0.05  | 0.20  | 1.00  | 0.52  | -0.15 | 0.13  | -0.06 | -0.13 | -0.09 | 0.02  | 0.13  |
| IE_Revenue (6)     | 0.15  | -0.09 | 0.04  | -0.20 | 0.52  | 1.00  | 0.10  | -0.07 | 0.04  | 0.05  | -0.04 | -0.11 | -0.03 |
| Leverage (7)       | 0.09  | 0.09  | 0.19  | -0.34 | -0.15 | 0.10  | 1.00  | 0.18  | 0.18  | 0.06  | -0.09 | -0.10 | 0.02  |
| MTBV (8)           | 0.02  | -0.09 | -0.28 | 0.32  | 0.13  | -0.07 | 0.18  | 1.00  | -0.09 | 0.05  | -0.11 | 0.09  | 0.04  |
| Stock_StdDev (9)   | 0.42  | -0.02 | -0.15 | -0.20 | -0.06 | 0.04  | 0.18  | -0.09 | 1.00  | 0.19  | 0.03  | 0.04  | -0.14 |
| Risk_Weight (10)   | 0.46  | -0.26 | -0.45 | -0.11 | -0.13 | 0.05  | 0.06  | 0.05  | 0.19  | 1.00  | 0.12  | -0.02 | -0.07 |
| Sov_Stock_Ret (11) | 0.01  | -0.06 | 0.00  | -0.06 | -0.09 | -0.04 | -0.09 | -0.11 | 0.03  | 0.12  | 1.00  | 0.01  | -0.15 |
| Sov_Rating (12)    | -0.19 | -0.08 | -0.09 | 0.08  | 0.02  | -0.11 | -0.10 | 0.09  | 0.04  | -0.02 | 0.01  | 1.00  | 0.26  |
| Ref_rate (13)      | -0.36 | -0.12 | 0.08  | 0.15  | 0.13  | -0.03 | 0.02  | 0.04  | -0.14 | -0.07 | -0.15 | 0.26  | 1.00  |

Notes: The table shows the correlation between the main variables of the full sample. The sample consists of 1,101 loans granted to listed non-financial firms established in EU member states during the 2006-2015 period.

Table S3 shows the estimates obtained by testing our alternative hypotheses *H1a* and *H1b*.

**Table S3.** The impact of CSR ratings on loan spreads.

|            | (1)                  |
|------------|----------------------|
| EW_Rating  | -0.416***<br>(0.078) |
| Size       | -0.107***<br>(0.018) |
| CashFlow   | -0.695**<br>(0.311)  |
| ROS        | -0.188<br>(0.166)    |
| IE_Revenue | 1.473**<br>(0.589)   |
| Leverage   | 0.555***<br>(0.138)  |

|                                     |           |
|-------------------------------------|-----------|
| MTBV                                | -0.019**  |
|                                     | (0.009)   |
| Stock_StdDev                        | 1.000***  |
|                                     | (0.134)   |
| Risk_Weight                         | 0.884***  |
|                                     | (0.081)   |
| Construction                        | -0.183*   |
|                                     | (0.102)   |
| Manufacturing                       | -0.083    |
|                                     | (0.072)   |
| Transportation and Public Utilities | -0.036    |
|                                     | (0.071)   |
| Wholesale Trade                     | 0.018     |
|                                     | (0.114)   |
| Retail Trade                        | -0.060    |
|                                     | (0.096)   |
| Services                            | 0.024     |
|                                     | (0.078)   |
| Maturity                            | 0.135     |
|                                     | (0.092)   |
| Secured                             | 0.251***  |
|                                     | (0.050)   |
| Covenant                            | 0.122**   |
|                                     | (0.057)   |
| Capital Expenditures                | -0.224    |
|                                     | (0.350)   |
| Leverage buyout                     | 0.786***  |
|                                     | (0.126)   |
| Restructuring                       | -0.339    |
|                                     | (0.226)   |
| Working capital                     | -0.140    |
|                                     | (0.125)   |
| Miscellaneous                       | 0.020     |
|                                     | (0.074)   |
| Term_Loan                           | 0.266***  |
|                                     | (0.039)   |
| Bridge_Loan                         | 0.085     |
|                                     | (0.117)   |
| Other                               | 0.281***  |
|                                     | (0.063)   |
| Mezzanine                           | 1.057***  |
|                                     | (0.358)   |
| Subordinated                        | 0.695***  |
|                                     | (0.128)   |
| Loan_Concentration                  | -0.013    |
|                                     | (0.027)   |
| Sov_Stock_Ret                       | 0.123     |
|                                     | (0.183)   |
| Sov_Rating                          | -0.066*** |
|                                     | (0.010)   |
| Ref_rate                            | 0.005     |
|                                     | (0.063)   |
| Lme                                 | 0.300***  |
|                                     | (0.047)   |
| LLme                                | 0.086     |
|                                     | (0.054)   |
| Sd                                  | 0.037     |
|                                     | (0.142)   |
| Hy                                  | -0.008    |
|                                     | (0.080)   |
| Constant                            | 5.596***  |
|                                     | (0.464)   |
| Year FE                             | YES       |
| Observations                        | 1,101     |
| Adjusted R-squared                  | 0.676     |

*Notes:* The table shows the results of Eq. (1) estimated by including *EW\_Rating* as our variable of interest. The dependent variable is *LnSpread*, a logarithm of the all-in-drawn spread of a loan granted to the *i*-th firm on day *t*. Robust standard errors are in parentheses. \*\*\*, \*\*, and \* denote significance at the 1%, 5%, and 10% level, respectively.

Table S4 shows the complete list of variables used in in Appendix B and their relative sources.

**Table S4.** Variable description.

| Variable   | Definition                                                                                                                                               | Source               |
|------------|----------------------------------------------------------------------------------------------------------------------------------------------------------|----------------------|
| Ec_Score   | Economic Score, based on the information in the ASSET4 economic pillar, of the <i>i-th</i> firm in the year preceding <i>t</i> .                         | ASSET4               |
| Soc_Score  | Social Score, based on the information in the ASSET4 social pillar, of the <i>i-th</i> firm in the year preceding <i>t</i> .                             | ASSET4               |
| Env_Score  | Environmental Score, based on the information in the ASSET4 environmental pillar, of the <i>i-th</i> firm in the year preceding <i>t</i> .               | ASSET4               |
| Gov_Score  | Governance Score, based on the information in the ASSET4 governance pillar, of the <i>i-th</i> firm in the year preceding <i>t</i> .                     | ASSET4               |
| HighZscore | Dummy variable equal to 1 if the z-score of the <i>i-th</i> firm in the year preceding <i>t</i> is in the highest tertile of the empirical distribution. | Authors' elaboration |
| LowZscore  | Dummy variable equal to 1 if the z-score of the <i>i-th</i> firm in the year preceding <i>t</i> is in the lowest tertile of the empirical distribution.  | Authors' elaboration |
| Secured    | Dummy variable equal to 1 if the loan is secured; 0 otherwise.                                                                                           | DealScan             |
| Small      | Dummy variable equal to 1 if the <i>i-th</i> firm's total assets in the year preceding <i>t</i> are lower than the tenth percentile of the sample.       | Authors' elaboration |
| Crisis     | Dummy variable equal to 1 in crisis periods of European economy.                                                                                         | OECD                 |

Table S5 report the estimates obtained by testing the impact of each CSR pillar on loan spread.

**Table S5.** The impact of firm's scores in each CSR pillar on loan spreads.

|                                     | (1)                  | (2)                  | (3)                  | (4)                  |
|-------------------------------------|----------------------|----------------------|----------------------|----------------------|
| Ec_Score                            | -0.223***<br>(0.072) | -                    | -                    | -                    |
| Soc_Score                           | -                    | -0.420***<br>(0.079) | -                    | -                    |
| Env_Score                           | -                    | -                    | -0.406***<br>(0.078) | -                    |
| Gov_Score                           | -                    | -                    | -                    | -0.143*<br>(0.076)   |
| Size                                | -0.131***<br>(0.018) | -0.110***<br>(0.018) | -0.105***<br>(0.018) | -0.136***<br>(0.017) |
| CashFlow                            | -0.525*<br>(0.317)   | -0.686**<br>(0.311)  | -0.748**<br>(0.313)  | -0.632**<br>(0.313)  |
| ROS                                 | -0.174<br>(0.175)    | -0.218<br>(0.166)    | -0.182<br>(0.172)    | -0.239<br>(0.180)    |
| IE_Revenue                          | 1.622***<br>(0.611)  | 1.466**<br>(0.595)   | 1.465**<br>(0.586)   | 1.873***<br>(0.609)  |
| Leverage                            | 0.558***<br>(0.138)  | 0.600***<br>(0.138)  | 0.552***<br>(0.138)  | 0.568***<br>(0.138)  |
| MTBV                                | -0.021**<br>(0.009)  | -0.019**<br>(0.009)  | -0.019**<br>(0.009)  | -0.020**<br>(0.009)  |
| Stock_StdDev                        | 0.965***<br>(0.135)  | 1.006***<br>(0.133)  | 1.041***<br>(0.135)  | 0.974***<br>(0.135)  |
| Risk_Weight                         | 0.884***<br>(0.082)  | 0.881***<br>(0.081)  | 0.911***<br>(0.081)  | 0.902***<br>(0.082)  |
| Construction                        | -0.177*<br>(0.104)   | -0.175*<br>(0.103)   | -0.164<br>(0.101)    | -0.207**<br>(0.105)  |
| Manufacturing                       | -0.092<br>(0.074)    | -0.088<br>(0.072)    | -0.041<br>(0.072)    | -0.092<br>(0.074)    |
| Transportation and Public Utilities | -0.038<br>(0.073)    | -0.037<br>(0.071)    | -0.007<br>(0.071)    | -0.037<br>(0.073)    |
| Wholesale Trade                     | 0.010<br>(0.113)     | 0.036<br>(0.118)     | 0.066<br>(0.117)     | 0.043<br>(0.119)     |
| Retail Trade                        | -0.061<br>(0.099)    | -0.080<br>(0.097)    | -0.033<br>(0.095)    | -0.053<br>(0.099)    |
| Services                            | 0.006<br>(0.079)     | 0.021<br>(0.078)     | 0.020<br>(0.078)     | 0.017<br>(0.080)     |
| Maturity                            | 0.126<br>(0.094)     | 0.122<br>(0.092)     | 0.131<br>(0.092)     | 0.125<br>(0.094)     |
| Secured                             | 0.256***<br>(0.050)  | 0.255***<br>(0.050)  | 0.250***<br>(0.050)  | 0.264***<br>(0.050)  |

|                      |                      |                      |                      |                      |
|----------------------|----------------------|----------------------|----------------------|----------------------|
| Covenant             | 0.123**<br>(0.057)   | 0.108*<br>(0.057)    | 0.113*<br>(0.058)    | 0.120**<br>(0.057)   |
| Capital Expenditures | -0.185<br>(0.335)    | -0.175<br>(0.364)    | -0.257<br>(0.358)    | -0.147<br>(0.376)    |
| Leverage buyout      | 0.789***<br>(0.126)  | 0.820***<br>(0.125)  | 0.748***<br>(0.125)  | 0.775***<br>(0.126)  |
| Restructuring        | -0.292<br>(0.260)    | -0.298<br>(0.244)    | -0.370<br>(0.231)    | -0.253<br>(0.268)    |
| Working capital      | -0.122<br>(0.126)    | -0.105<br>(0.123)    | -0.159<br>(0.123)    | -0.084<br>(0.121)    |
| Miscellaneous        | 0.017<br>(0.076)     | 0.024<br>(0.075)     | 0.021<br>(0.075)     | 0.024<br>(0.076)     |
| Term_Loan            | 0.279***<br>(0.039)  | 0.267***<br>(0.039)  | 0.270***<br>(0.039)  | 0.276***<br>(0.039)  |
| Bridge_Loan          | 0.082<br>(0.118)     | 0.081<br>(0.117)     | 0.089<br>(0.116)     | 0.098<br>(0.122)     |
| Other                | 0.283***<br>(0.064)  | 0.282***<br>(0.063)  | 0.288***<br>(0.063)  | 0.274***<br>(0.064)  |
| Mezzanine            | 1.054***<br>(0.349)  | 1.075***<br>(0.354)  | 1.039***<br>(0.355)  | 1.042***<br>(0.351)  |
| Subordinated         | 0.668***<br>(0.137)  | 0.689***<br>(0.127)  | 0.690***<br>(0.121)  | 0.651***<br>(0.128)  |
| Loan_Concentration   | -0.011<br>(0.027)    | -0.015<br>(0.027)    | -0.012<br>(0.027)    | -0.010<br>(0.027)    |
| Sov_Stock_Ret        | 0.177<br>(0.182)     | 0.129<br>(0.181)     | 0.146<br>(0.183)     | 0.156<br>(0.184)     |
| Sov_Rating           | -0.062***<br>(0.010) | -0.068***<br>(0.010) | -0.068***<br>(0.010) | -0.064***<br>(0.010) |
| Ref_rate             | 0.008<br>(0.064)     | 0.013<br>(0.063)     | 0.001<br>(0.062)     | 0.000<br>(0.063)     |
| Lme                  | 0.244***<br>(0.046)  | 0.273***<br>(0.046)  | 0.253***<br>(0.046)  | 0.296***<br>(0.052)  |
| LLme                 | 0.074<br>(0.055)     | 0.061<br>(0.053)     | 0.058<br>(0.054)     | 0.073<br>(0.054)     |
| Sd                   | 0.041<br>(0.141)     | 0.026<br>(0.142)     | -0.024<br>(0.149)    | 0.022<br>(0.138)     |
| Hy                   | 0.019<br>(0.080)     | 0.003<br>(0.080)     | -0.061<br>(0.081)    | -0.007<br>(0.080)    |
| Constant             | 5.761***<br>(0.478)  | 5.664***<br>(0.462)  | 5.565***<br>(0.464)  | 5.823***<br>(0.466)  |
| Year FE              | YES                  | YES                  | YES                  | YES                  |
| Observations         | 1,101                | 1,101                | 1,101                | 1,101                |
| Adjusted R-squared   | 0.670                | 0.675                | 0.675                | 0.668                |

Notes: In columns (1), (2), (3), and (4), we report results of Eq. (1) estimated by replacing *Ev\_Rating* alternatively with: *Ec\_Score*, *Soc\_Score*, *Env\_Score* and *Gov\_Score*. The dependent variable is *LnSpread*, a logarithm of the all-in-drawn spread of a loan granted to the *i*-th firm on day *t*. Robust standard errors are in parentheses. \*\*\*, \*\*, and \* denote significance at the 1%, 5%, and 10% level, respectively.
